# Supplementary material
Source: HighWire-hosted journal article supplement (http://thorax.bmjjournals.com/highwire/filestream/174050/field_highwire_adjunct_files/2/62185webonlyfig3.pdf)

Figure C: Hospital admissions for asthma by age, England & Wales 1962-2003

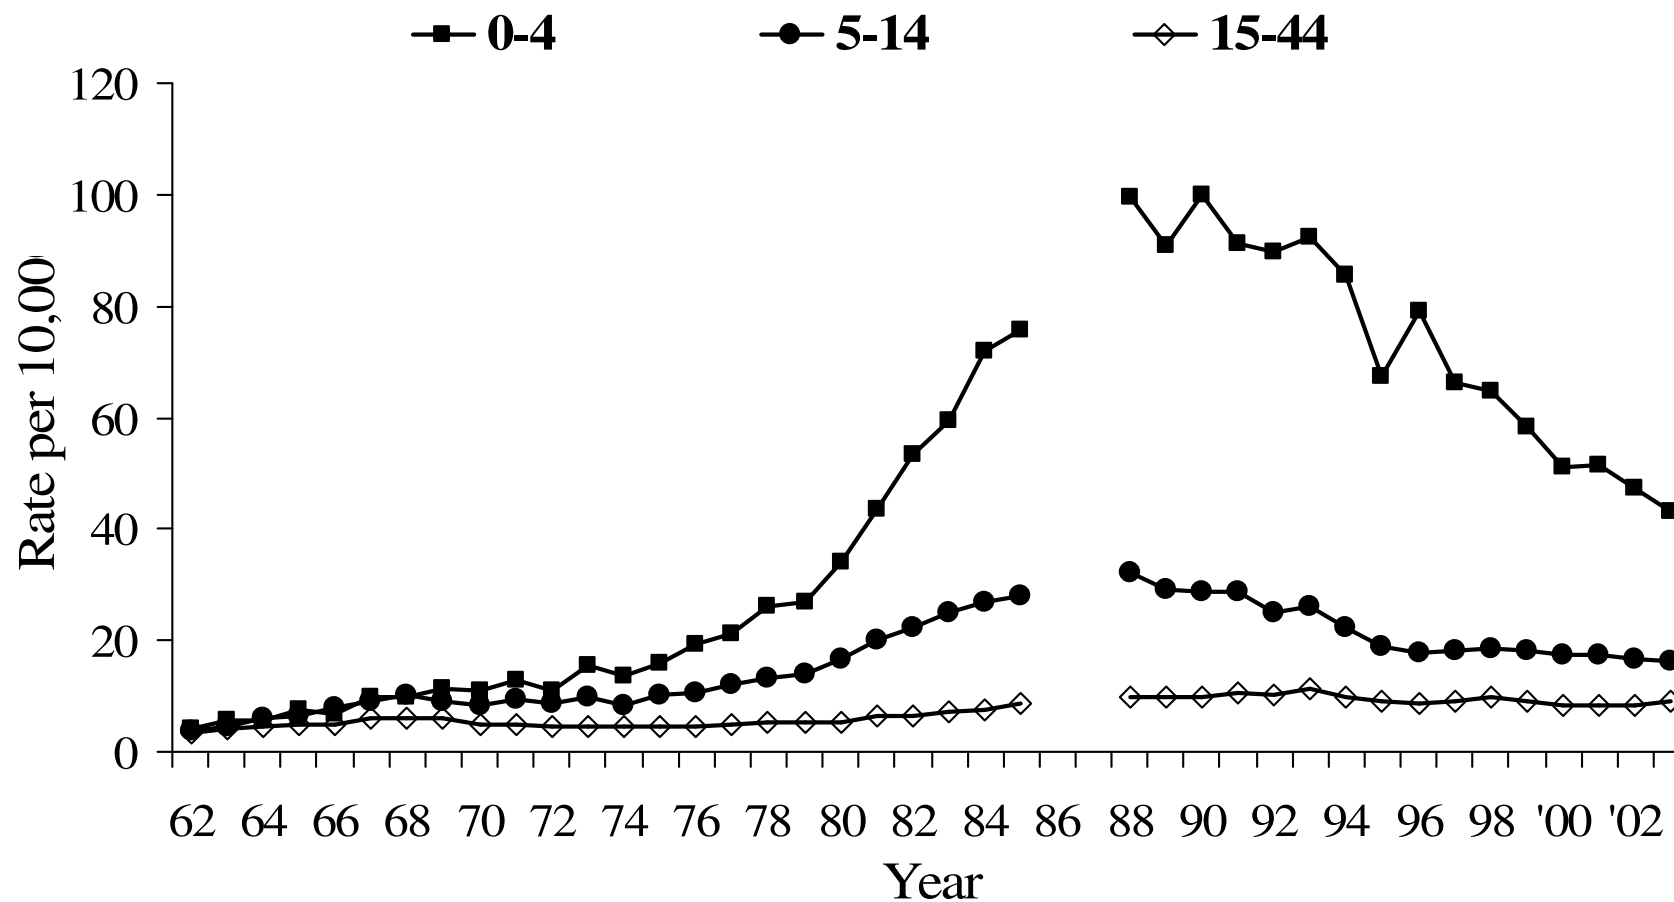

Supplement: 62185webonlyfig3.pdf [file 62185webonlyfig3.pdf]
